# Supplementary material for: Interactions of Protonated Guanidine and Guanidine Derivatives with Multiply Deprotonated RNA Probed by Electrospray Ionization and Collisionally Activated Dissociation
Source: PubMed Central journal article supplement (PMC5715244; doi:10.1002/open.201700143), 2017-10-24
Supplement: OPEN-6-739-s001.pdf [file OPEN-6-739-s001.pdf]

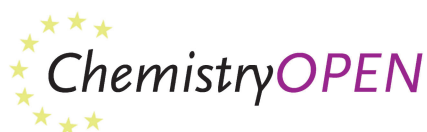

## Supporting Information

© 2017 The Authors. Published by Wiley-VCH Verlag GmbH & Co. KGaA, Weinheim

### **Interactions of Protonated Guanidine and Guanidine Derivatives with Multiply Deprotonated RNA Probed by Electrospray Ionization and Collisionally Activated Dissociation**

Jovana Vušurović, Eva-Maria Schneeberger, and Kathrin Breuker\*<sup>[a]</sup>

open\_201700143\_sm\_miscellaneous\_information.pdf

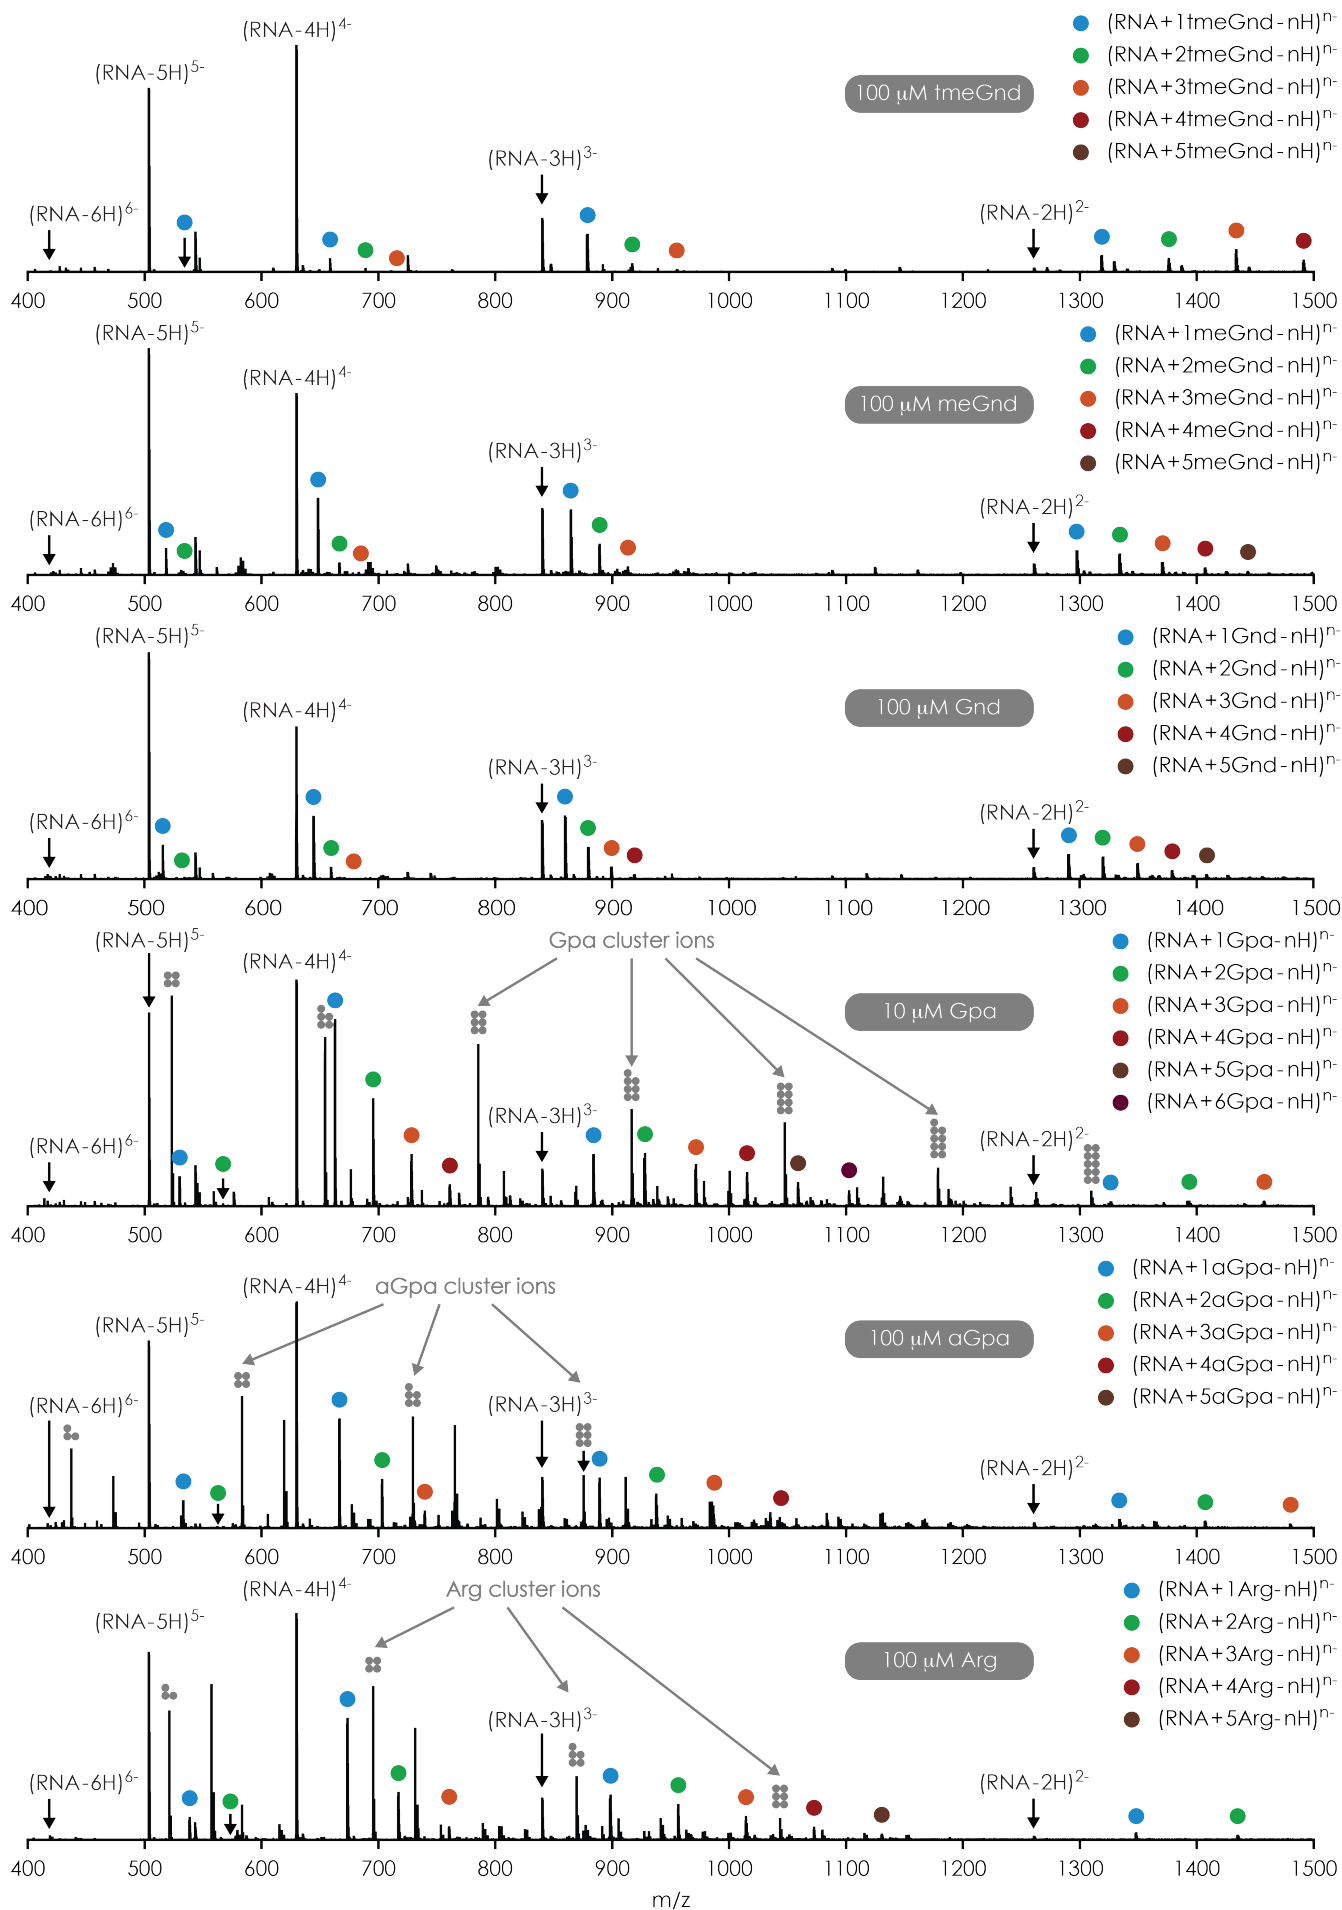

**Figure S1.** Mass spectra from electrospray ionization of 1  $\mu\text{M}$  RNA solutions in 1:1  $\text{H}_2\text{O}/\text{CH}_3\text{OH}$  with 100  $\mu\text{M}$  tetramethylguanidine (tmeGnd), 1-methylguanidine (meGnd), guanidine (Gnd), 1,1,3,3-L-2-amino-3-guanidinopropanoic acid (aGpa), L-arginine (Arg), and 10  $\mu\text{M}$  3-guanidinopropanoic acid (Gpa) at pH  $\sim$ 7.5; colored circles indicate the number of ligands bound to the 8 nt RNA and grey circles indicate singly charged ligand cluster ions.

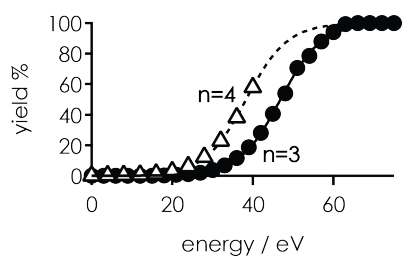

**Figure S2.** Yield of *c*, *y*, *a*, and *w* fragments from RNA backbone cleavage and loss of charged and neutral RNA nucleobases from CAD of  $(\text{RNA-nH})^{n-}$  ions at  $n=3$  and 4 versus energy, illustrating the higher stability of  $(\text{RNA-3H})^{3-}$  over  $(\text{RNA-4H})^{4-}$  ions, the CAD data at  $n=3$  are the same as in Figure 6A for  $m=0$ .

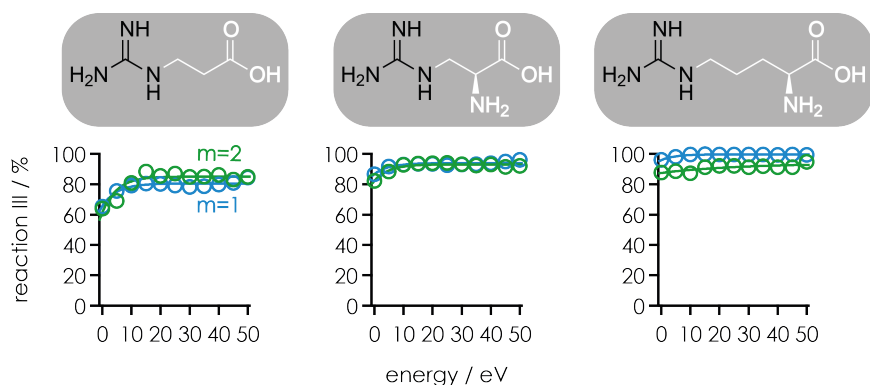

**Figure S3.** Fraction of products from reaction III out of all products from reactions II and III (left axes) in CAD of  $(\text{RNA+mL-5H})^{m-}$  ions for  $m=1$  (blue) and  $m=2$  (green) for Gpa, aGpa, and Arg versus laboratory frame energy.

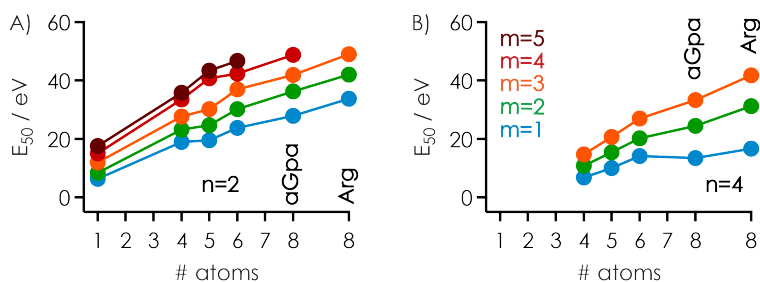

**Figure S4.**  $E_{50}$  values for dissociation of all ligands in CAD of  $(\text{RNA+mL-nH})^{n-}$  complex ions with  $m=1-5$  for A)  $n=2$  and B)  $n=4$  versus the number of atoms that can potentially be involved in hydrogen bond or salt bridge interactions with the RNA.

| <b>Table S1.</b> From ESI of 1 $\mu\text{M}$ RNA and 5-100 $\mu\text{M}$ ligand solutions in 1:1 $\text{H}_2\text{O}/\text{CH}_3\text{OH}$ at pH 7.5, fraction of $(\text{RNA+mL-nH})^{n-}$ ions with $m \geq 1$ for each $n$ . |                                      |       |       |       |       |       |
|---------------------------------------------------------------------------------------------------------------------------------------------------------------------------------------------------------------------------------|--------------------------------------|-------|-------|-------|-------|-------|
| ligand                                                                                                                                                                                                                          | ligand concentration / $\mu\text{M}$ | $n=2$ | $n=3$ | $n=4$ | $n=5$ | $n=6$ |
| tmeGnd                                                                                                                                                                                                                          | 100                                  | 94.3  | 48.8  | 6.2   | 0.1   | 0     |
| meGnd                                                                                                                                                                                                                           | 100                                  | 86.4  | 62.2  | 33.7  | 11.4  | 0     |
| Gnd                                                                                                                                                                                                                             | 100                                  | 87.0  | 66.7  | 33.7  | 13.8  | 0     |
| Gpa                                                                                                                                                                                                                             | 5                                    | 78.9  | 52.2  | 30.4  | 6.8   | 0     |
|                                                                                                                                                                                                                                 | 10                                   | 94.1  | 88.0  | 63.7  | 14.8  | 0     |
| aGpa                                                                                                                                                                                                                            | 50                                   | 77.6  | 68.1  | 39.2  | 9.4   | 0     |
|                                                                                                                                                                                                                                 | 100                                  | 81.6  | 73.9  | 45.2  | 14.2  | 0     |
| Arg                                                                                                                                                                                                                             | 50                                   | 73.6  | 65.6  | 40.1  | 9.6   | 0     |
|                                                                                                                                                                                                                                 | 100                                  | 81.3  | 76.2  | 46.1  | 11.5  | 0     |

**Table S2.** Extent of unintended ligand loss during isolation in the linear quadrupole.

| Complex charge state (n) | Number of ligands (m) | tmeGnd | meGnd | Gnd   | Gpa   | aGpa  | Arg   |
|--------------------------|-----------------------|--------|-------|-------|-------|-------|-------|
| 2                        | 5                     | 78.76  | 32.95 | 89.09 | 0     | -     | -     |
|                          | 4                     | 63.90  | 16.62 | 10.61 | 0     | 28.24 | -     |
|                          | 3                     | 48.25  | 9.61  | 0     | 0     | 24.18 | 16.19 |
|                          | 2                     | 48.75  | 3.38  | 0     | 0     | 11.39 | 17.33 |
|                          | 1                     | 12.71  | 0     | 0     | 0     | 4.63  | 12.38 |
| 3                        | 4                     | 99.43  | 53.22 | 48.37 | 11.48 | 16.43 | -     |
|                          | 3                     | 92.69  | 26.55 | 6.75  | 13.46 | 10.63 | 7.36  |
|                          | 2                     | 86.07  | 19.17 | 4.35  | 9.48  | 11.56 | 10.89 |
|                          | 1                     | 65.02  | 4.29  | 1.62  | 1.03  | 3.85  | 7.64  |
| 4                        | 3                     | 99.66  | 86.86 | 56.32 | 27.42 | 18.13 | 22.00 |
|                          | 2                     | 98.92  | 44.48 | 21.60 | 12.91 | 11.41 | 7.65  |
|                          | 1                     | 88.17  | 18.27 | 6.53  | 4.51  | 6.31  | 5.22  |
| 5                        | 2                     | 100    | 88.30 | 75.87 | 91.16 | 90.28 | 82.90 |
|                          | 1                     | 100    | 50.90 | 39.00 | 68.70 | 65.63 | 29.35 |
